# Supplementary material for: Glutaredoxin 3 promotes nasopharyngeal carcinoma growth and metastasis via EGFR/Akt pathway and independent of ROS
Source: PubMed Central journal article supplement (PMC5095054; doi:10.18632/oncotarget.9454), 2016-05-18
Supplement: oncotarget-07-37000-s001.pdf [file oncotarget-07-37000-s001.pdf]

## Glutaredoxin 3 promotes nasopharyngeal carcinoma growth and metastasis *via* EGFR/Akt pathway and independent of ROS

### Supplementary Materials

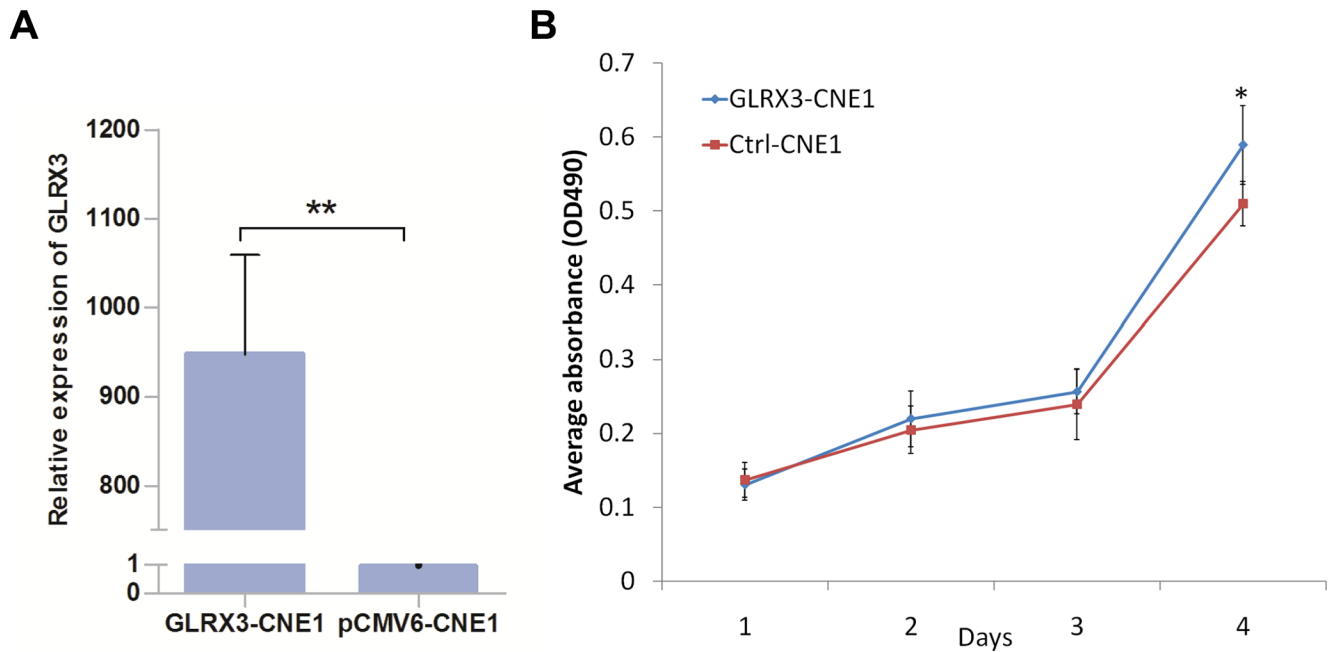

**Supplementary Figure S1: Ectopic expression of GLRX3 in CNE1 promotes cell proliferation *in vitro*.** (A) Confirmation of *GLRX3* transcription in CNE1 cells by real-time PCR. (B) CCK8 assay of proliferation ability of *GLRX3*-CNE1 and pCMV6-CNE1 cell lines. Data are mean  $\pm$  SD of five independent experiments. (\* $p < 0.05$ ).

**A**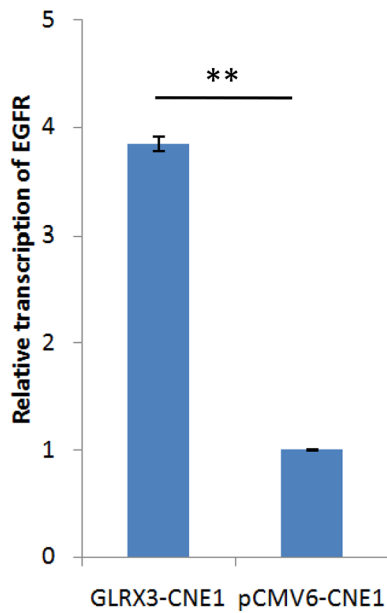**B**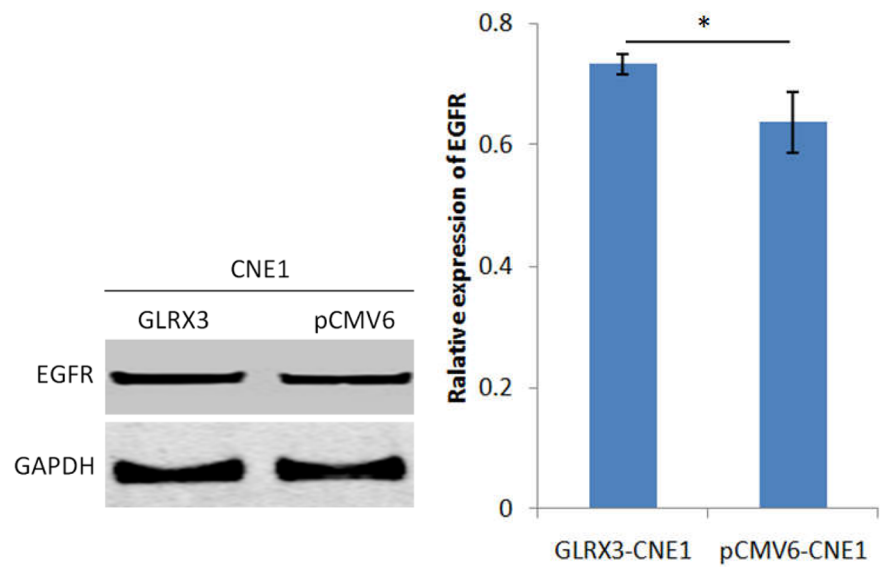

**Supplementary Figure S2: GLRX3 stabilizes the expression of EGFR in CNE1 cell line.** (A) Detection of *EGFR* transcriptional level in *GLRX3*-CNE1 and pCMV6-CNE1 by real-time RT-PCR. (B) Analysis of EGFR expression by Western blot. Data are Mean  $\pm$  SD from three independent experiments. (\* $p < 0.05$ ; \*\* $p < 0.01$ ).

## MATERIALS AND METHODS

### Vector construction and transfection

Full-length cDNA from the open reading frame of *GLRX3* inserted in pCMV6-entry plasmid was purchased from Origen Co. (Beijing, China). CNE1 cells were

seeded in 6-well plates at a density of  $6 \times 10^5$  cells/well, and transfected with 2  $\mu$ g pCMV6-entry-*GLRX3* or empty vector pCMV6-entry with X-treme GENE HP DNA Transfection Reagent according to the instruction (Roche Diagnostic, Penzberg, Germany) and incubated for 48 h.
